# Supplementary material for: MAP3K8 (TPL2/COT) Affects Obesity-Induced Adipose Tissue Inflammation without Systemic Effects in Humans and in Mice
Source: PubMed Central journal article supplement (PMC3933658; doi:10.1371/journal.pone.0089615), 2014-02-24
Supplement: pone.0089615.s001.pdf [file pone.0089615.s001.pdf]

## Supplemental Table TPL2

Table S1

| <b><i>Gene</i></b>              | <b><i>Forward primer</i></b> | <b><i>Reverse primer</i></b> |
|---------------------------------|------------------------------|------------------------------|
| <b>m36B4</b>                    | AGCGCGTCCTGGCATTGTGTGG       | GGGCAGCAGTGGTGGCAGCAGC       |
| <b>mGAPDH</b>                   | AGGTCGGTGTGAACGGATTTG        | TGTAGACCATGTAGTTGAGGTCA      |
| <b>mCD68</b>                    | CCAATTCAGGGTGAAGAAA          | CTCGGGCTCTGATGTAGGTC         |
| <b>mF480</b>                    | CTTTGGCTATGGGCTTCCAGTC       | GCAAGGAGGACAGAGTTTATCGTG     |
| <b>mMCP-1</b>                   | CCAATGAGTAGGCTGGAGA          | TCTGGACCCATTCCTTCTTG         |
| <b>mTNF-<math>\alpha</math></b> | CAGACCCTCACACTCAGATCATCT     | CCTCCACTTGGTGGTTTGCTA        |
| <b>mIFN<math>\gamma</math></b>  | ATGAACGCTACACACTGCATC        | CCATCCTTTTGCCAGTTCCTC        |
| <b>mIL-1<math>\beta</math></b>  | GCAACTGTTCTTGAACCTCAACT      | ATCTTTTGGGGTCCGTCAACT        |
| <b>mIL-1ra</b>                  | AAATCTGCTGGGGACCCTAC         | TGAGCTGGTTGTTTCTCAGG         |
| <b>mIL-6</b>                    | CAAGTCGGAGGCTTAATTACACATG    | ATTGCCATGCACAACCTTTTCT       |
| <b>mCXCL-1</b>                  | TGGCTGGGATTCACCTCAA          | GAGTGTGGCTATGACTTCGGTTT      |
| <b>hB2M</b>                     | ATGAGTATGCCTGCCGTGTG         | CCAAATGCGGCATCTTCAAAC        |
| <b>hIL-1<math>\beta</math></b>  | CAGCTACGAATCTCCGACCAC        | GGCAGGGAACCAGCATCTTC         |
| <b>hTNF-<math>\alpha</math></b> | TGGCCCAGGCAGTCAGA            | GGTTTGCTACAACATGGGCTACA      |
| <b>hIL-6</b>                    | AATTCGGTACATCCTCGACGG        | GGTTGTTTCTGCCAGTGCCT         |
| <b>hIL-8</b>                    | ACTGAGAGTGATTGAGAGTGGAC      | AACCCTCTGCACCCAGTTTC         |
